# Supplementary material for: Disparities in SARS-CoV-2 seroprevalence among individuals presenting for care in central North Carolina over a six-month period
Source: PubMed Central journal article supplement — medRxiv. 2021 Mar 30:2021.03.25.21254320. Preprint. [Version 2] doi: 10.1101/2021.03.25.21254320 (PMC8010775; doi:10.1101/2021.03.25.21254320), 2021-03-30
Supplement: media-1.pdf [file media-1.pdf]

1 **Supplementary Appendix**

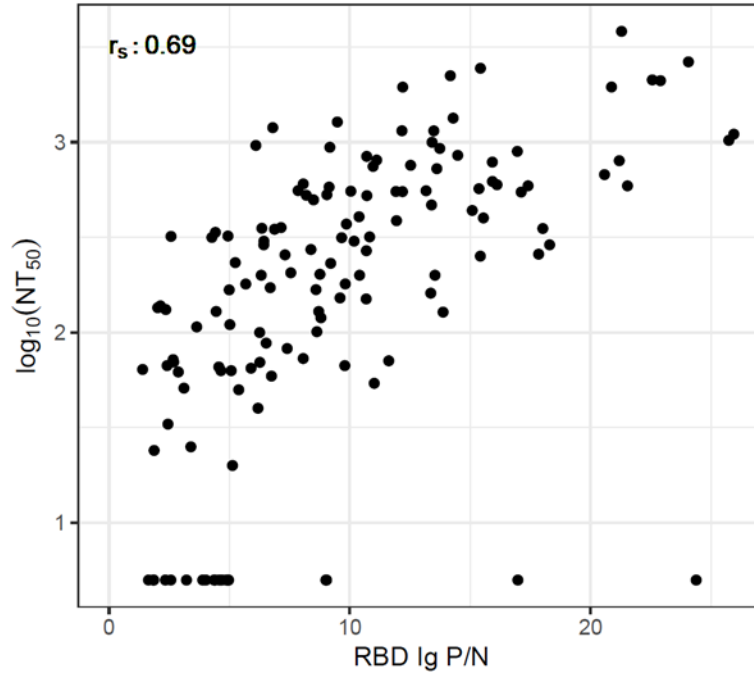

17 **Figure S1. Correlation plot between RBD Ig P/N and neutralization assay.** Spearman correlation coefficient was  
18 obtained ( $r_s$ ),  $p < 0.0001$ .

19  
20  
21  
22  
23  
24  
25  
26  
27  
28  
29  
30  
31

| <b>Table S1. ELISA Validation Data</b>              |                                                                |                               |
|-----------------------------------------------------|----------------------------------------------------------------|-------------------------------|
|                                                     | <b>% Sensitivity (95% CI)</b>                                  | <b>% Specificity (95% CI)</b> |
| RBD total Ig ELISA<br>(≥ 9 days post symptom onset) | 89.7% (130/145) (84.7, 94.6)                                   | 99.3% (272/274) (98.3, 100.0) |
|                                                     |                                                                |                               |
| PCR+ controls (n = 145)                             | N = 32 (Crotty Lab, La Jolla)                                  |                               |
|                                                     | N = 113 (UNC CP donor cohort)                                  |                               |
|                                                     |                                                                |                               |
| Negative controls (n = 274)                         | N = 122 (UNC pre-2019 healthy adults)                          |                               |
|                                                     | N = 48 (UNC pre-COVID-19 arboviral samples, TB endemic region) |                               |
|                                                     | N = 44 (UNC, clinical pre-organ transplant)                    |                               |
|                                                     | N = 28 (UNC, clinical HIV+)                                    |                               |
|                                                     | N = 16 (healthy adults, Crotty Lab, La Jolla)                  |                               |
|                                                     | N = 16 (UNC, respiratory illness samples, COVID-19 negative)   |                               |

32

33 **Table S1. ELISA Validation Data.** CI, confidence interval; PCR, polymerase chain reaction; CP, convalescent  
34 plasma; TB, tuberculosis.

35

36

37

38

39

40

41

| <b>Table S2. Study Individual Numbers by Clinical Factors.</b> |      |                  |            |                  |            |                   |            |
|----------------------------------------------------------------|------|------------------|------------|------------------|------------|-------------------|------------|
|                                                                |      | <b>4/19-6/13</b> |            | <b>6/14-8/08</b> |            | <b>8/09-10/03</b> |            |
|                                                                |      | <b>N</b>         | <b>(%)</b> | <b>N</b>         | <b>(%)</b> | <b>N</b>          | <b>(%)</b> |
| <b>Hospital</b>                                                |      |                  |            |                  |            |                   |            |
| Chatham Hospital                                               | 604  | 17.4             | 909        | 25.8             | 298        | 11.3              |            |
| UNC Hospitals                                                  | 1490 | 43.0             | 1491       | 42.3             | 1291       | 49.0              |            |
| Johnston Hospital                                              | 627  | 18.1             | 639        | 18.1             | 473        | 18.0              |            |
| Rex Hospital                                                   | 742  | 21.4             | 489        | 13.9             | 571        | 21.7              |            |
| <b>In/Outpatient</b>                                           |      |                  |            |                  |            |                   |            |
| Inpatient                                                      | 1057 | 30.5             | 961        | 27.2             | 839        | 31.9              |            |
| Outpatient                                                     | 2394 | 69.1             | 2562       | 72.6             | 1792       | 68.1              |            |
| Unknown                                                        | 12   | 0.3              | 5          | 0.1              | 2          | 0.1               |            |
| <b>Visit type</b>                                              |      |                  |            |                  |            |                   |            |
| Traumatic                                                      | 104  | 3.0              | 103        | 2.9              | 62         | 2.4               |            |
| Not traumatic                                                  | 2961 | 85.5             | 3066       | 86.9             | 2180       | 82.8              |            |
| Unknown                                                        | 398  | 11.5             | 359        | 10.2             | 391        | 14.8              |            |
| <b>Condition</b>                                               |      |                  |            |                  |            |                   |            |
| Respiratory                                                    | 173  | 5.0              | 167        | 4.7              | 75         | 2.8               |            |
| COVID-19                                                       | 31   | 0.9              | 35         | 1.0              | 30         | 1.1               |            |
| Other                                                          | 2861 | 82.6             | 2967       | 84.1             | 2137       | 81.2              |            |
| Unknown                                                        | 398  | 11.5             | 359        | 10.2             | 391        | 14.8              |            |
| <b>Payor</b>                                                   |      |                  |            |                  |            |                   |            |
| Public                                                         | 1825 | 52.7             | 2050       | 58.1             | 1509       | 57.3              |            |
| Private                                                        | 1249 | 36.1             | 1172       | 33.2             | 920        | 34.9              |            |
| Self-Pay                                                       | 326  | 9.4              | 254        | 7.2              | 181        | 6.9               |            |
| Other/Unknown                                                  | 63   | 1.8              | 52         | 1.4              | 23         | 0.8               |            |

**Table S2. Study Individual Numbers by Clinical Factors.**

73

| <b>Table S3. Rates of COVID-19 Visit Codes for Inpatients and Outpatients.</b> |                  |                   |
|--------------------------------------------------------------------------------|------------------|-------------------|
|                                                                                | <b>Inpatient</b> | <b>Outpatient</b> |
| <b>COVID-19 Visit Code</b>                                                     | 80/2828 (2.8%)   | 16/5646 (0.3%)    |

74

75 **Table S3. Rates of COVID-19 Visit Codes for Inpatients and Outpatients.**

76

77

78

| <b>Table S4. Subset of individuals with recorded Abbott IgG</b> |                                               |                                               |
|-----------------------------------------------------------------|-----------------------------------------------|-----------------------------------------------|
|                                                                 | <b>Abbott Nucleocapsid ELISA<br/>negative</b> | <b>Abbott Nucleocapsid ELISA<br/>positive</b> |
| <b>RBD Ig ELISA negative</b>                                    | 132                                           | 3                                             |
| <b>RBD Ig ELISA positive</b>                                    | 5                                             | 10                                            |

79

80 **Table S4. Subset of individuals with recorded Abbott IgG.** RBD Ig ELISA results for 150 patients who received a  
81 UNC hospital lab-based Abbott nucleocapsid IgG ELISA within one month prior to study enrollment.

82

83

| <b>S5. Insurance category by race/ethnicity</b> |                |       |               |       |                 |       |                      |      |
|-------------------------------------------------|----------------|-------|---------------|-------|-----------------|-------|----------------------|------|
|                                                 | <b>Private</b> |       | <b>Public</b> |       | <b>Self-Pay</b> |       | <b>Other/Unknown</b> |      |
|                                                 | N              | (%)   | N             | (%)   | N               | (%)   | N                    | (%)  |
| <b>NL White</b>                                 | 2173           | 36.17 | 3439          | 57.24 | 347             | 5.78  | 49                   | 0.82 |
| <b>NL Black</b>                                 | 641            | 28.48 | 1402          | 62.28 | 177             | 7.86  | 31                   | 1.38 |
| <b>NL Other</b>                                 | 323            | 53.92 | 223           | 37.23 | 42              | 7.01  | 11                   | 1.84 |
| <b>Latinx</b>                                   | 204            | 26.63 | 320           | 41.78 | 195             | 25.46 | 47                   | 6.14 |
| <b>TOTAL</b>                                    | 3341           | 34.72 | 5384          | 55.94 | 761             | 7.91  | 138                  | 1.43 |

84

85 **Table S5. Count and percentage in each insurance category by race/ethnicity.**

86

| <b>Table S6. Raw sample positivity by hospital</b> |                  |                  |                   |
|----------------------------------------------------|------------------|------------------|-------------------|
|                                                    | <b>4/19-6/13</b> | <b>6/14-8/08</b> | <b>8/09-10/03</b> |
| <b>Johnston Hospital</b>                           | 7.81             | 18.00            | 14.80             |
| <b>Chatham Hospital</b>                            | 7.45             | 8.69             | 12.08             |
| <b>UNC Hospitals</b>                               | 4.03             | 9.93             | 10.38             |
| <b>Rex Hospital</b>                                | 4.04             | 5.93             | 7.71              |

87

88 **Table S6. Raw antibody test positivity (percent) by hospital.**

## 89 **Supplementary Methods: Bayesian seroprevalence models with unknown sensitivity and specificity**

### 90 **1 Determining Test Results**

#### 91 **1.1 Quantitative test outcome**

92 To account for plate-to-plate variability (i.e., batch effects), similar to Zhang and colleagues,<sup>1</sup> we used P/N ratios,  
93 rather than using the raw optical density (OD) values, defined as

$$94 \quad P/N = \frac{\text{average OD sample}}{\text{average OD negative control}}$$

95 where the negative control values were those from the same plate as the sample. Accounting for batch effects in the  
96 P/N ratio removes the need for defining plate specific cutoffs, and rather we can define one cutoff on how many  
97 times larger the sample's OD value is relative to the corresponding negative control's OD value.

#### 98 **1.2 Cutoff Selection**

99 The CDC recommends selecting a threshold such that the test has 99.5% specificity.<sup>2</sup> We followed this  
100 recommendation here specifying the cutoff to be the standard estimate of the 0.995 quantile (based on the quantile  
101 function in R) of the negative lab samples. Using the 274 negative controls, the cutoff was 2.57 with empirical  
102 sensitivity of 89.7% and empirical specificity of 99.3%. Therefore, a sample is considered positive if its average OD  
103 value is 2.57 or more times larger than the average OD of the corresponding plate negative controls.

### 104 **2. Temporal Logistic Model**

105 We fit a Bayesian autoregressive logistic model to estimate weekly prevalence while accounting for uncertainty in  
106 test sensitivity and specificity. Let  $n_t$  give the number of samples in week  $t$ , and  $y_t$  give the number of samples that  
107 tested positive in week  $t$ , for  $t \in \{1, \dots, T = 24\}$ . Then

$$108 \quad y_t \sim \text{binomial}(n_t, p_t) \quad t = 1, \dots, T$$

109 where  $p_t$  gives the probability of a positive test in week  $t$ . To account for the error rate of the test, we define

$$110 \quad p_t = \pi_t \text{sens} + (1 - \pi_t)(1 - \text{spec})$$

111 where  $\pi_t$  is the probability an individual has COVID-19 antibodies in week  $t$ ,  $\text{sens}$  gives the sensitivity of the test,  
112 and  $\text{spec}$  gives the specificity of the test.

113 Assuming seroprevalence varies smoothly, we define an AR(1) process for the  $\pi_t$  as follows. First, let  $\beta_t =$   
114  $\text{logit}(\pi_t)$ . Then we model  $\beta_t$  as

$$115 \quad \beta_t \sim \text{normal}(\alpha + \varphi \beta_{t-1}, \sigma_\beta^2) \quad t = 2, \dots, T$$

$$116 \quad \beta_1 \sim \text{normal}(\alpha, 0.5).$$

117 As we expect autocorrelation and we are on the logit scale, we expect  $\sigma_\beta^2$  to be relatively small, so a relatively  
118 vague prior is assumed

$$119 \quad \sigma_\beta^2 \sim \text{normal}^+(0, 0.5),$$

120 where  $\text{normal}^+$  indicates the folded normal distribution. We found changing the prior variance of  $\sigma_\beta^2$  had minimal  
121 effect on the estimates and associated uncertainty of  $\{\pi_t\}$ . Similarly, we put vague priors on  $\alpha$ ,  $\varphi$ ,  $\text{sens}$ , and  $\text{spec}$ :

$$122 \quad \alpha \sim \text{logistic}(0, 1);$$

$$123 \quad \varphi \sim \text{normal}(0, 1);$$



124  $\text{sens} \sim \text{uniform}(0, 1);$

125  $\text{spec} \sim \text{uniform}(0, 1).$

126 Finally, to estimate sensitivity and specificity, we assume

127  $y_{\text{spec}} \sim \text{binomial}(n_{\text{spec}}, \text{spec}),$

128  $y_{\text{sens}} \sim \text{binomial}(n_{\text{sens}}, \text{sens})$

129 where  $y_{\text{spec}}$  is the number of negative controls that tested negative out of  $n_{\text{spec}}$  negative controls. Similarly,  $y_{\text{sens}}$  is the  
130 number of positive controls that tested positive out of  $n_{\text{sens}}$  positive controls.

### 131 3. Logistic Regression Model

132 We fit a Bayesian logistic regression model with main effects for sex, race/ethnicity, age, in/out-patient status, and  
133 payor. Interactions were considered, but not found to significantly improve the fit. This model allows us to  
134 simultaneously model the hospital data and the lab validation data.

135 To ensure each category in our main effects had a sufficient sample size, some categories were collapsed. All  
136 outpatient, emergency, or unknown patients were listed as “outpatient.” Additionally, the “other” and “unknown”  
137 categories for payor were collapsed. Finally, the one patient with sex listed as “X” was removed from the dataset for  
138 this analysis.

139 We define the likelihood

140  $y_i \sim \text{Bernoulli}(q_i) \quad i = 1, \dots, n$

141 where  $y_i$  is an indicator for whether individual  $i$  tests positive for COVID-19 antibodies and  $q_i$  is the probability of a  
142 positive test for individual  $i$ . The number of patients is given by  $n$ . To account for the error rate of the test, similar to  
143 the temporal model, we define

144  $q_i = \pi_i \text{sens} + (1 - \pi_i)(1 - \text{spec})$

145 where  $\pi_i$  is the probability individual  $i$  has COVID-19 antibodies,  $\text{sens}$  gives the sensitivity of the test, and  $\text{spec}$   
146 gives the specificity of the test. Finally, the probability a patient has COVID-19 antibodies is assumed to equal

147  $\pi_i = \text{logit}^{-1}(\beta_{0t_i} + \mathbf{x}'_i \boldsymbol{\alpha}_{t_i})$

148 for the vector of  $p$  predictors  $\mathbf{x}_i$ , coefficients  $\boldsymbol{\alpha}_t$ , and intercept  $\beta_{0t}$ , where  $t_i$  gives the time period patient  $i$  was  
149 sampled during,  $t \in \{1, \dots, T = 3\}$ . This allows the intercept and coefficients to vary across time periods, but the  
150 sensitivity and specificity estimates to be pooled across time. For this analysis, the vector  $\mathbf{x}$  contains indicators for  
151 Male, NL Black, NL Other, Latinx, age 18-49, age 50-64, age 65-99, outpatient, public payor, self-pay, and  
152 unknown payor. This leaves inpatient, private paying, NL White, females aged 5-17 as the baseline category. Let  $\mathbf{x}_i$   
153 be the  $i^{\text{th}}$  row of the  $n \times p$  matrix  $\mathbf{X}$ . We calculated the effect of the covariates over the entire study period as

154  $\bar{\boldsymbol{\alpha}} = \sum_{t=1}^T \boldsymbol{\alpha}_t / T,$

155 and present  $\exp(\bar{\boldsymbol{\alpha}})$  as the average estimated odds ratio.

156 As before, to estimate sensitivity and specificity, we assume

157  $y_{\text{spec}} \sim \text{binomial}(n_{\text{spec}}, \text{spec})$

158  $y_{\text{sens}} \sim \text{binomial}(n_{\text{sens}}, \text{sens})$

159 where  $y_{\text{spec}}$  is the number of negative controls that tested negative out of  $n_{\text{spec}}$  negative controls and  $y_{\text{sens}}$  is the  
160 number of positive controls that tested positive out of  $n_{\text{sens}}$  positive controls.

161 We chose non-informative priors:

162  $\alpha_t \sim \text{normal}(\mathbf{0}_p, 2\mathbf{I}_p)$

163  $\text{sens} \sim \text{uniform}(0, 1)$

164  $\text{spec} \sim \text{uniform}(0, 1)$

165  $\beta_{0t} + \bar{\mathbf{x}}_t' \alpha_t \sim \text{logistic}(0,1) \quad t = 1, \dots, T$

166

167 where  $\bar{\mathbf{x}}_t$  is the  $p$ -dimensional vector of the average of each column of  $\mathbf{X}$  across the rows corresponding with time  
168 period  $t$  (i.e. the proportion of observations in each group during that time period). In this way, following Gelman  
169 and Carpenter (2020)<sup>3</sup>, the prior on  $\beta_0$  models the probability of the average patient being seropositive as uniform on  
170 the interval  $(0,1)$ . Note, because the  $\alpha_t$  coefficients are on the logit scale, a variance of 2 is relatively vague. For  
171 example, this places about 68% probability that an element of  $\alpha_t$  is between  $-\sqrt{2}$  and  $\sqrt{2}$ , evaluating to a  
172 subpopulation having 0.24 to 4.11 times the seroprevalence of another.

173 An artifact of the model accounting for uncertainty in test sensitivity and specificity is that when there is low  
174 observed positivity, small changes in the estimated specificity can result in large changes in the overall  
175 seroprevalence, compared to when there is larger overall positivity. Therefore, there is more uncertainty in these  
176 cases (as we observed in earliest time period of our data compared to the latter two). This is because when there are  
177 very few positive tests, small declines in the estimated specificity suggest the observed positives should be classified  
178 as false positives and the seroprevalence is very low. Without copious amounts of lab validation data, some  
179 uncertainty in specificity is expected and this uncertainty will propagate to the seroprevalence and coefficient  
180 estimates.

#### 181 **4. MCMC Algorithm**

182 The models were fit using a Markov chain Monte Carlo algorithm implemented in Stan.<sup>4</sup> For each model, we ran  
183 four chains 5000 iterations each with the first 2500 iterations used as burn-in. The  $\hat{R}$  value<sup>5</sup> was 1 for each  
184 parameter, suggesting convergence. The effective sample size was over 2300 for each parameter in the logistic  
185 regression model, and over 1000 for each parameter in the temporal model.

#### 186 **5. Quantifying Uncertainty**

187 For results from the Bayesian models, we reported posterior means and equal-tail 95% credible intervals (i.e., the  
188 2.5% and 97.5% quantiles of the posterior draws). In Table S1, we calculated standard 95% confidence intervals:

189 
$$\hat{p} \pm Z_{\alpha/2} \sqrt{\frac{\hat{p}(1-\hat{p})}{n}}$$

190 where  $\hat{p}$  denotes the observed proportion,  $n$  is the sample size, and  $Z_{\alpha/2}$  is the  $\alpha/2$  quantile of the standard normal  
191 distribution.

#### 192 **6. Demographic data categorization**

193 To categorize individual clinical encounters associated with the blood draws we sampled, we obtained ICD-10 codes  
194 from any inpatient or outpatient visit at the same location within fourteen days of when we received and sampled the  
195 blood draw. We prioritized inpatient visits over outpatient visits unless no inpatient visit was available. If there was  
196 no visit within the past fourteen days of the blood draw, we instead used the visit closest to the most recent specimen  
197 collection date within a thirty-day period. Individuals with no visit at the same location within thirty days of their  
198 blood draw were excluded from analysis. To capture any upper respiratory infection, respiratory disease due to  
199 external agents, interstitial lung disease, imaging abnormalities of the lung, cough, fever, and dyspnea, we used the  
200 International Classification of Diseases, 10th revision (ICD-10) codes J00-J006, J009-J018, J20-J22, J40-J47, J60-  
201 J70, J80-J84, J96-J99, R91, R05, R06.0, and R50. COVID-19 diagnosis was defined as presence of the U07.1 code

202 in the visit nearest the sampled blood draw. Likewise, acute or trauma cases were defined as any of the following  
203 ICD-10 codes: O00, O01, O02, O03, O04, O07, O08, O015-1, all S codes, all T codes (except T36-T39, T41, T46,  
204 T50, T80-T88), all V codes, all W codes, all X codes, all Y codes (except Y62-Y84 and Y-90-99).

205 Insurance status was determined from the most recent clinical encounter prior to the sampled blood draw. “Private  
206 Insurance” was classified as any of the following listed for a patient’s visit: Blue Cross/Blue Shield, Private health  
207 insurance, or State Government insurance. “Public Insurance” was classified as any of these following: Medicaid  
208 applicant, Medicaid, Medicare, Department of Veteran’s Affairs, Tricare, and Corrections State insurance. “Self-pay”  
209 includes anyone paying out of pocket. “Unknown/Other” consists of individuals for whom the health insurance payer  
210 was left blank or otherwise unidentifiable, as well as listed insurance that read “Legal Liability / Liability Insurance”,  
211 “Other specified but not otherwise classifiable (includes Hospice - Unspecified plan)”, and “Other”.

212 Race and ethnicity identity was ascertained from that listed in the EMR for each patient. The categories listed under  
213 Epic’s EMR that we received included “American Indian or Alaska Native”, “Asian”, “Black or African American”,  
214 “Native Hawaiian or other Pacific Islander”, “Other Race”, “Patient Refused”, “Unknown” or “White or Caucasian”.  
215 For ethnicity, we received information on whether patients self-identified as “Hispanic or Latino”, or were listed as  
216 “Patient Refused” or “Unknown”. In our report, we collapse race and ethnicity from separate variables into a single  
217 variable in order to investigate the impact of systemic racism on SARS-COV-2 seroprevalence by both race and  
218 ethnicity at the same time, though the constructs of race and ethnicity are inherently surrogate measures of racism and  
219 other forms of marginalization.<sup>6</sup>

220 We therefore binned individuals into the following groups: “Black or African American” that indicated “Non-Hispanic  
221 or Latino,” “Patient Refused,” or “Unknown” were binned as “Non-Latinx Black”, similarly for “White or Caucasian”  
222 as “Non-Latinx White”, similarly for all other groups as “Non-Latinx Other”. Anyone that indicated “Hispanic or  
223 Latino” were binned as “Latinx”, and therefore could self-identify as any of the above race categories. We do not  
224 further separate out other intersections of race and ethnicity because the number of individuals becomes too small to  
225 make conclusive claims on odds of seropositivity. We here opt to use Latinx in place of “Hispanic” though it is not  
226 the only way to refer to this grouping of individuals that often share cultural characteristics, language, religion, and  
227 ancestral geography and history.<sup>7</sup> We also compare racial, ethnic, and age demographics in the study population to the  
228 demographics of the 6-county area where most of the study population resided using data collected from US Census  
229 Data.<sup>8</sup>

## 230 **References**

- 231 1. Zhang L, Zhang JJ, Kubiak RJ, Yang H. Statistical methods and tool for cut point analysis in  
232 immunogenicity assays. *Journal of immunological methods*. 2013 Mar 29;389(1-2):79-87.
- 233 2. Interim Guidelines for COVID-19 Antibody Testing [Internet]. Centers for Disease Control and Prevention;  
234 2020 [cited 2021Jan1]. Available from: [https://www.cdc.gov/coronavirus/2019-ncov/lab/resources/antibody-tests-](https://www.cdc.gov/coronavirus/2019-ncov/lab/resources/antibody-tests-guidelines.html)  
235 [guidelines.html](https://www.cdc.gov/coronavirus/2019-ncov/lab/resources/antibody-tests-guidelines.html)
- 236 3. Gelman A, Carpenter B. Bayesian analysis of tests with unknown specificity and sensitivity. *Journal of the*  
237 *Royal Statistical Society: Series C (Applied Statistics)*. 2020 Nov;69(5):1269-83.
- 238 4. Stan Development Team. RStan: the R interface to Stan. R package version 2.21.1, 2020. <http://mc-stan.org/>.
- 239 5. Gelman A, Carlin JB, Stern HS, Dunson DB, Vehtari A, Rubin DB. *Bayesian data analysis*. CRC press; 2013  
240 Nov 1.
- 241 6. Williams DR, Mohammed SA, Leavell J, Collins C. Race, socioeconomic status, and health: Complexities,  
242 ongoing challenges, and research opportunities. *Ann N Y Acad Sci*. 2010;1186:69-101. doi:10.1111/j.1749-  
243 6632.2009.05339.x
- 244 7. Guidotti-Hernández NM. Affective communities and millennial desires: Latinx, or why my computer won’t  
245 recognize Latina/o. *Cult Dyn*. 2017;29(3):141-159. doi:10.1177/0921374017727853
- 246 8. US Census Bureau. American Community Survey 5-Year Data (2014-2018). Table B03002. 2019  
247 <https://www.census.gov/data/developers/data-sets/acs-5year.html> (accessed Dec 3, 2020)
